# Supplementary material
Source: Springer Nature journal article supplement (https://www.springermedizin.de/resource/supplementary/13058_2011_2962_MOESM2_ESM.pdf/9702926)

**A**

NTC

HW11

HW13

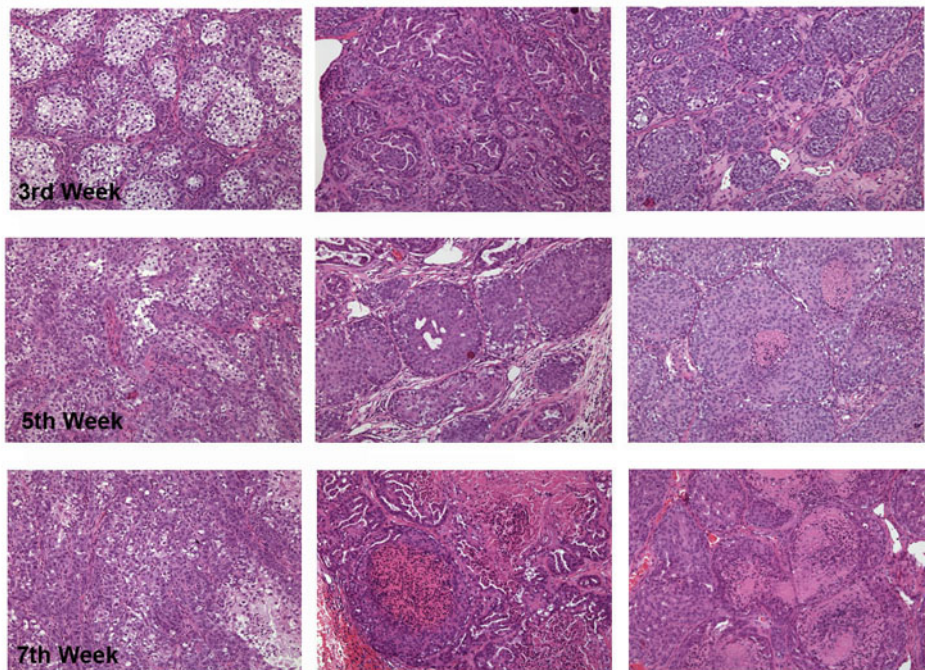**B**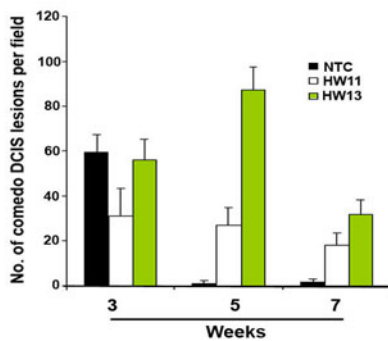

Supplement: MOESM2 [file 9702926]
